# Supplementary material for: Bayesian population structure analysis reveals presence of phylogeographically specific sublineages within previously ill-defined T group of Mycobacterium tuberculosis
Source: PLoS One. 2017 Feb 6;12(2):e0171584. doi: 10.1371/journal.pone.0171584 (PMC5293260; doi:10.1371/journal.pone.0171584)
Supplement: S2 Table — (XLSX) [file pone.0171584.s007.xlsx]

## Sheet: Feuil1
T sublineages compared	p-value
1 - 2 :	(0.0974)
1 - 3 :	(0.3108)
2 - 3 :	(0.2110)
1 - 4 :	(0.0028)
2 - 4 :	(0.0697)
3 - 4 :	(0.0113)
1 - 5 :	(0.0369)
2 - 5 :	(0.3117)
3 - 5 :	(0.0979)
4 - 5 :	(0.1618)
1 - 6 :	(0.0631)
2 - 6 :	(0.4081)
3 - 6 :	(0.1503)
4 - 6 :	(0.1064)
5 - 6 :	(0.3980)
1 - 7 :	(0.0025)
2 - 7 :	(0.0651)
3 - 7 :	(0.0103)
4 - 7 :	(0.4860)
5 - 7 :	(0.1533)
6 - 7 :	(0.1001)
1 - 8 :	(0.1512)
2 - 8 :	(0.3955)
3 - 8 :	(0.2954)
4 - 8 :	(0.0406)
5 - 8 :	(0.2248)
6 - 8 :	(0.3094)
7 - 8 :	(0.0377)
